# Supplementary material for: Time Trend Analysis of Tuberculosis Treatment While Using Digital Adherence Technologies—An Individual Patient Data Meta-Analysis of Eleven Projects across Ten High Tuberculosis-Burden Countries
Source: MDPI journal article supplement (doi:10.3390/tropicalmed7050065), 2022-04-22
Supplement: s1 [file s1]

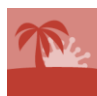

# Supplementary material of Time Trend Analysis of Tuberculosis Treatment While Using Digital Adherence Technologies — An Individual Patient Data Meta-Analysis of Eleven Projects across Ten High-Tuberculosis-Burden Countries

**Table S1.** Findings of tobit regression analyses; time trend in TB treatment adherence, differences in adherence across subgroups and differences in time trends across subgroups excluding the manually registered doses.

|                          |                        | DS-TB Population<br>(n = 3829)              | DR-TB Population<br>(n = 473) |
|--------------------------|------------------------|---------------------------------------------|-------------------------------|
| <b>Overall statement</b> |                        | Decrease                                    | Fluctuating                   |
| <b>Between months</b>    | 1-2                    | ↓**                                         | ↑                             |
|                          | 2-3                    | ↓**                                         | ↓                             |
|                          | 3-4                    | ↓**                                         | ↓                             |
|                          | 4-5                    | ↓**                                         | ↑                             |
|                          | 5-6                    | ↓**                                         | ↓                             |
|                          | Sex                    | Males —**                                   | Males —                       |
| <b>Factors</b>           | Age (years)            | 15-34 —<br>35-50 —                          | 15-34 +<br>35-50 —            |
|                          | Enrollment period      | Second half —**                             | Second half +*                |
|                          | DAT type               | evriMED +**                                 | VOT —**                       |
|                          | Project                | +/-*                                        | +/-*                          |
|                          | Time*sex               | Males ↘* <sup>2,5,6</sup>                   | +/-                           |
|                          | Time*age               | 15-34 ↘* <sup>3,4</sup>                     | +/-                           |
| <b>Effect modifiers</b>  | Time*enrollment period | Second half ↘* <sup>3,4</sup>               | Second half ↗* <sup>6</sup>   |
|                          | Time*DAT type          | evriMED ↘** <sup>3,4</sup> ↗** <sup>6</sup> | VOT ↘* <sup>3,4,5</sup>       |
|                          | Time*project           | +/-*                                        | +/-*                          |

**Between months:** ↑ = increase; ↓ = decrease.

**Factors:** + = subgroup had higher adherence than reference group; — = subgroup had lower adherence than reference group; +/- = differences in adherence between projects.

**Effect modifiers:** ↗ = subgroup had a steeper increase in adherence over time than reference group; ↘ = subgroup had a steeper decrease in adherence over time than reference group; +/- = different directions of regression coefficients between months, or between projects.

**Reference categories:** females (sex), >50 (age), first half (DAT start date), 99DOTS in DS-TB, evriMED in DR-TB (DAT), projects (changed).

\*p<0.05, \*\*p<0.01, 2,3,4,5,6 = month at which difference is significant. Light grey when not significant. Differences with the main analyses are colored orange. <sup>I</sup> DS TB= drug-sensitive tuberculosis;

<sup>II</sup> DR TB= drug-resistant TB; <sup>III</sup> DAT=digital adherence technology; <sup>IV</sup> VOT=video-observed therapy;

<sup>V</sup> HCF=health care facility.
